# Supplementary material
Source: PubMed Central journal article supplement (PMC6588495)
Supplement: NIHMS1012812-supplement-Supp_Tables.pdf [file NIHMS1012812-supplement-Supp_Tables.pdf]

**Supplemental Table 1.** Unadjusted overall survival rates at 1-year and 5-years for breast cancer stages I-III comparing the AJCC Cancer Staging Manual 7<sup>th</sup> and 8<sup>th</sup> editions.

| Stage        | AJCC Staging Manual, 7 <sup>th</sup> edition |                                  | AJCC Staging Manual, 8 <sup>th</sup> edition |                                  |
|--------------|----------------------------------------------|----------------------------------|----------------------------------------------|----------------------------------|
|              | 1-year Survival Rate<br>(95% CI)             | 5-year Survival Rate<br>(95% CI) | 1-year Survival Rate<br>(95% CI)             | 5-year Survival Rate<br>(95% CI) |
| <b>IA</b>    | 0.99 (0.99-0.99)                             | 0.93 (0.93-0.93)                 | 0.99 (0.99-0.99)                             | 0.93 (0.93-0.93)                 |
| <b>IB</b>    | 0.99 (0.99-0.99)                             | 0.93 (0.93-0.94)                 | 0.99 (0.99-0.99)                             | 0.88 (0.88-0.88)                 |
| <b>IIA</b>   | 0.99 (0.99-0.99)                             | 0.88 (0.88-0.88)                 | 0.98 (0.98-0.98)                             | 0.83 (0.82-0.83)                 |
| <b>IIB</b>   | 0.98 (0.98-0.98)                             | 0.84 (0.83-0.84)                 | 0.97 (0.97-0.98)                             | 0.78 (0.77-0.79)                 |
| <b>IIIA</b>  | 0.97 (0.97-0.98)                             | 0.80 (0.79-0.80)                 | 0.97 (0.96-0.97)                             | 0.73 (0.72-0.74)                 |
| <b>IIIB</b>  | 0.91 (0.89-0.92)                             | 0.55 (0.52-0.57)                 | 0.95 (0.94-0.95)                             | 0.64 (0.63-0.66)                 |
| <b>IIIC</b>  | 0.96 (0.95-0.96)                             | 0.67 (0.65-0.68)                 | 0.91 (0.90-0.91)                             | 0.51 (0.49-0.53)                 |
| <b>Total</b> | 0.99 (0.99-0.99)                             | 0.89 (0.89-0.89)                 | 0.99 (0.99-0.99)                             | 0.89 (0.89-0.89)                 |
